# Supplementary material for: Changes in population immunity against infection and severe disease from SARS-CoV-2 Omicron variants in the United States between December 2021 and November 2022
Source: bioRxiv or medRxiv preprint supplement (doi:10.1101/2022.11.19.22282525), 2022-11-23

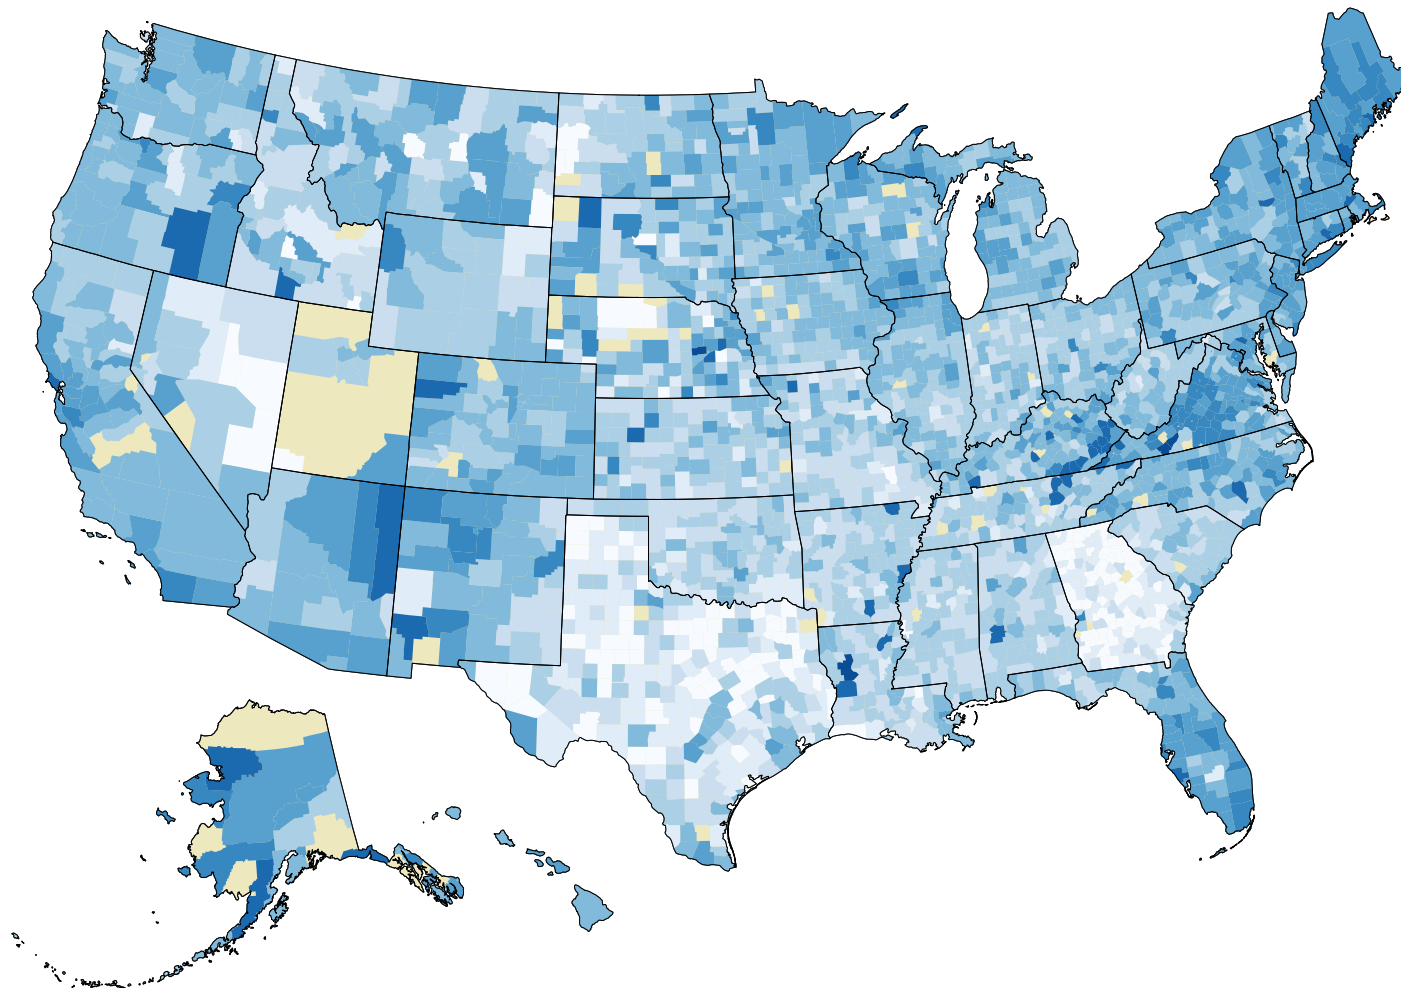

Immunity on November 9

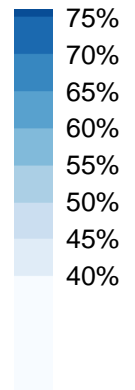

Supplement: Supplementary file [file media-6.pdf]
